# Supplementary material for: Multi-component assembly and luminescence tuning of lanthanide hybrids based with both zeolite L/A and SBA-15 through two organically grafted linkers
Source: Royal Society of Chemistry journal article supplement (doi:10.1039/c4dt01169d), 2014-01-01
Supplement: c4dt01169d1.pdf [file c4dt01169d1.pdf]

## Supporting information

### Multi-component assembly and luminescence tuning of lanthanide hybrids based Zeolite L/A and SBA-15 through two organically grafted linkers

Lei Chen, Bing Yan\*

Department of Chemistry, Tongji University, Siping Road 1239, Shanghai 200092, China

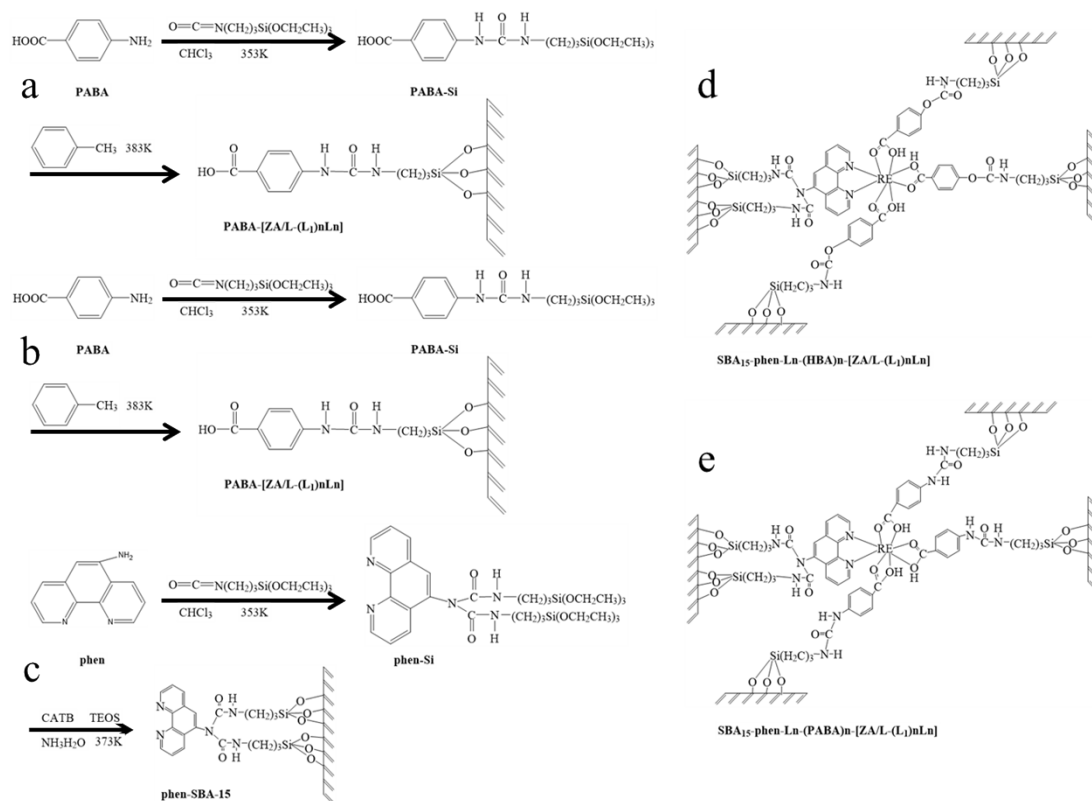

**Figure S1** The synthesis process of the organically modified silane linkers phen-Si, HBA-Si, ABA-Si, functionalized microporous zeolite L/Z and SBA-15 (HBA-[Z/L-Ln-L1] (a), ABA-[Z/L-Ln-L1] (b) and phen-SBA-15 (c) and final hybrids S-phen-Ln-HBA-[Z/L-Ln-L1] (d) and S-phen-Ln-ABA-[Z/L-Ln-L1] (e).

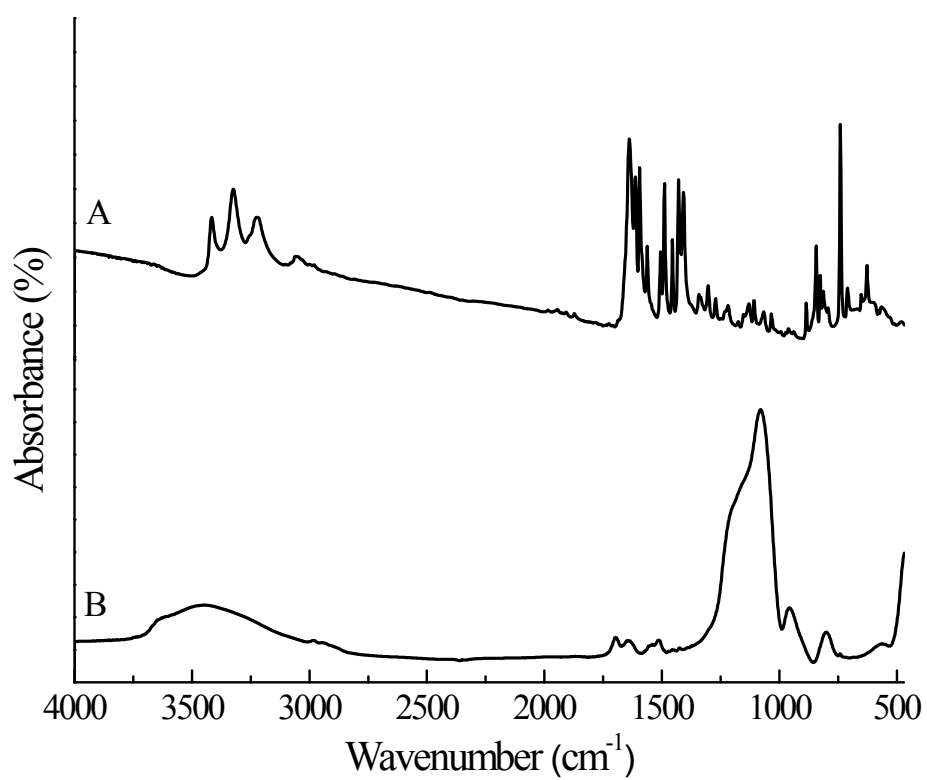

**Figure S2** FTIR spectrum of the free ligand phen-NH<sub>2</sub> (A) and the precursor phen-SBA-15 (B).

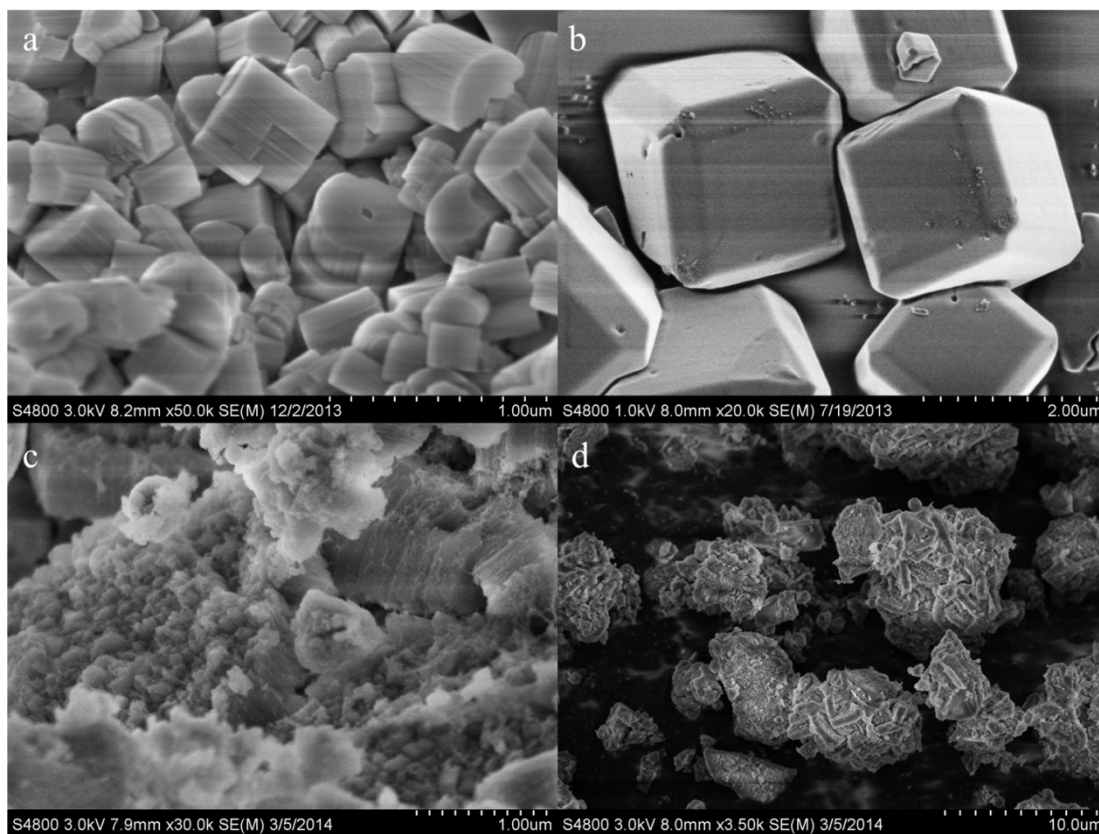

**Figure S3** SEM images of zeolite L crystals (a), zeolite A crystals (b) and micro-mesoporous hybrid materials S-phen-Eu-HBA-[ZA-bipy-Tb] (c), S-phen-Eu-ABA-[ZL-bipy-Tb] (d)

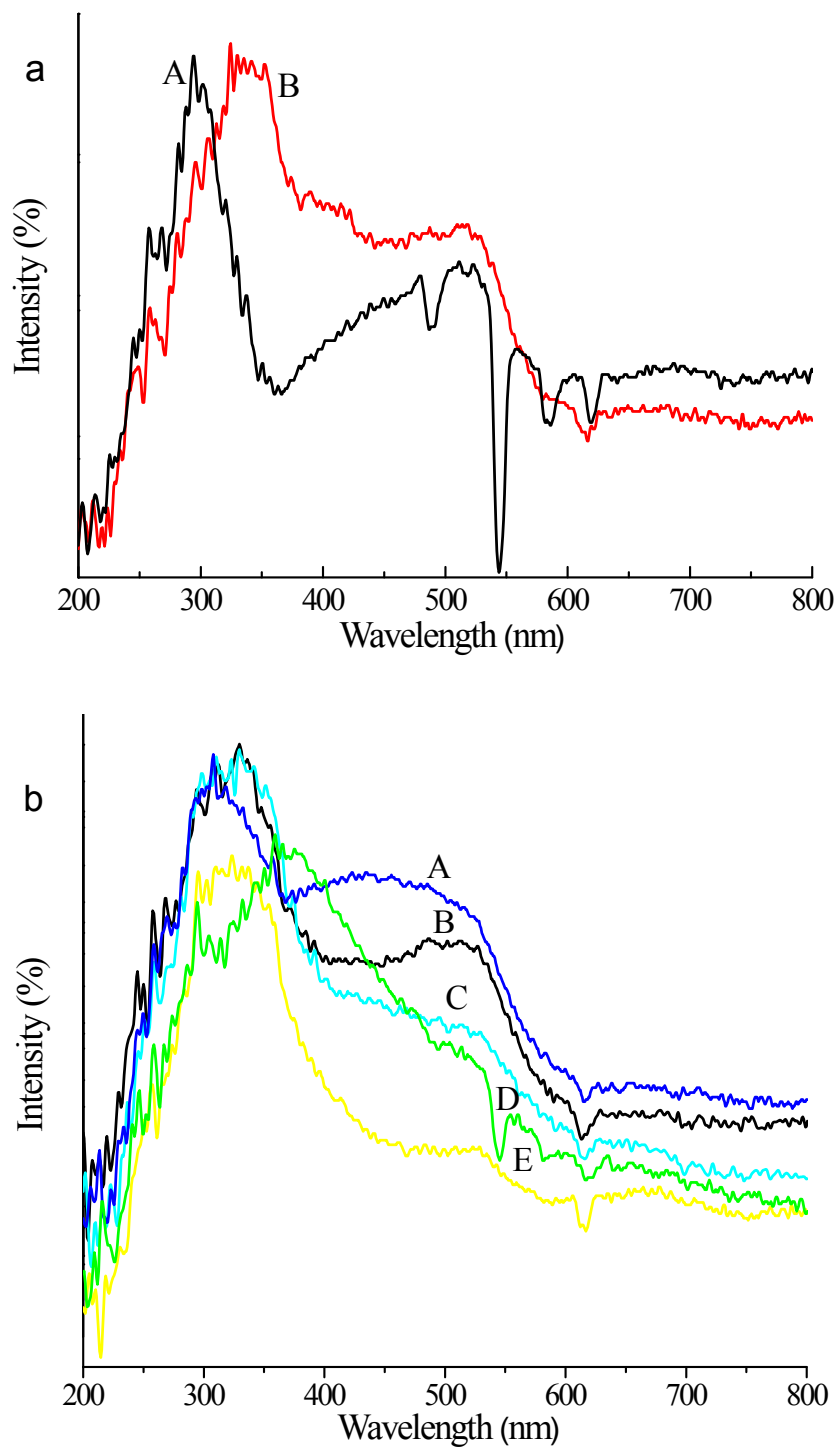

**Figure S4** Ultraviolet-visible diffuse reflective absorption spectra of hybrids with Zn<sup>2+</sup> loaded zeolites (a) S-phen-Eu-HBA-[ZA-Zn-bipy] (A) and S-phen-Tb-ABA-[ZL-Zn-bipy] (B); (b) hybrids with Ln<sup>3+</sup> loaded zeolites S-phen-Eu-ABA-[ZL-Tb-bipy] (A), S-phen-Eu-HBA-[ZA-Tb-bipy] (B), S-phen-Eu-ABA-[ZA-Tb-bipy] (C), S-phen-Tb-HBA-[ZA-Eu-TTA] (D) and S-phen-Eu-ABA-[ZA-Tb-TAA] (E).

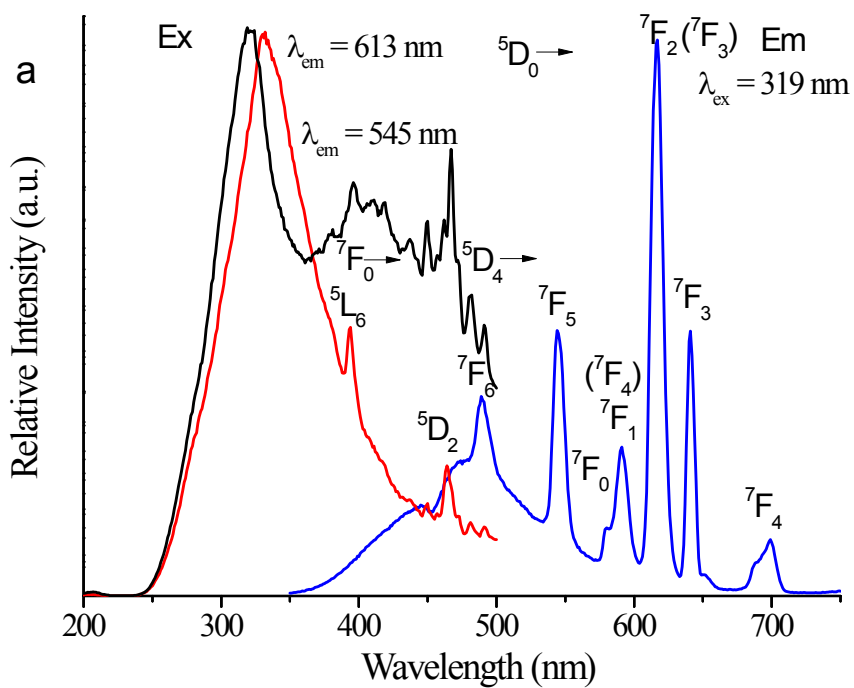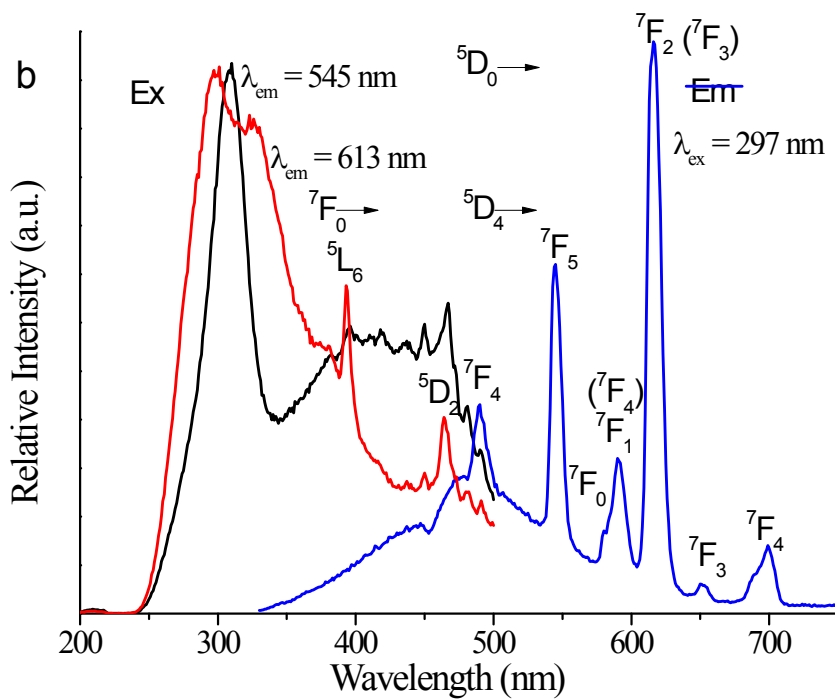

**Figure S5** Luminescent spectra of hybrid materials S-phen-Eu-ABA-[ZA-Tb-TAA] (a) and S-phen-Eu-ABA-[ZL-Tb-bipy] (b).

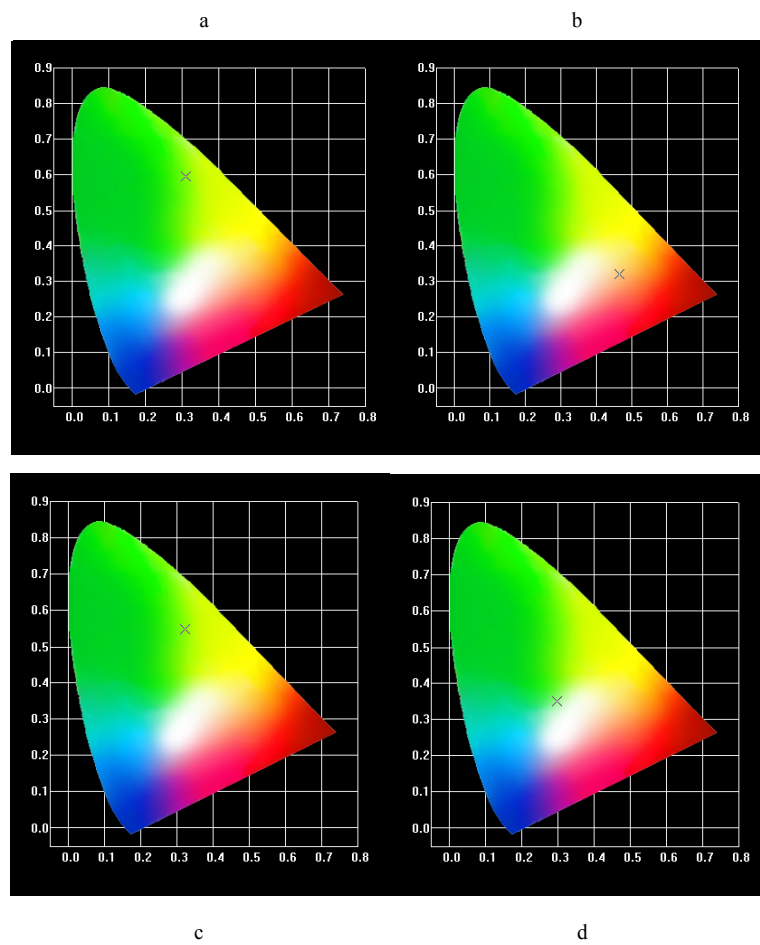

**Figure S6** The CIE diagrams of hybrid materials: (a) S-phen-Tb-ABA-[ZA-Zn-bipy], (b) S-phen-Eu-ABA-[ZA-Tb-bipy] and (c)-(d) Tb-HBA-[ZA-Eu-TTA] (c,  $\lambda_{\text{ex}} = 305 \text{ nm}$ ; d,  $\lambda_{\text{ex}} = 357 \text{ nm}$ )
